# Supplementary material for: Preserved neurogenesis in non-demented individuals with AD neuropathology
Source: PubMed Central journal article supplement (PMC4906289; doi:10.1038/srep27812), 2016-06-14
Supplement: srep27812-s1.pdf [file srep27812-s1.pdf]

Supplementary Figures

for

**Preserved neurogenesis in non-demented individuals with AD neuropathology.**

David Briley, Valeria Ghirardi, Randy Woltjer, Alicia Renck, Olga Zolocheska, Giulio Tagliatela, Maria-Adelaide Micci

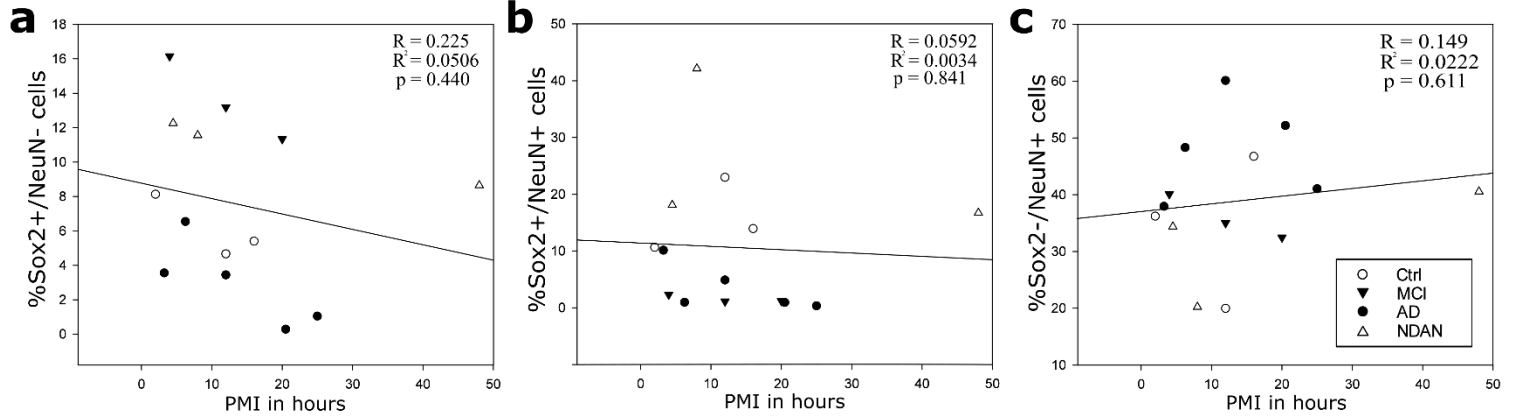

**Supplementary Figure 1.** The postmortem interval does not correlate with the measurements made. Correlation analysis between the postmortem interval and SOX2 expression show no significant interaction.
